# Supplementary material for: Assessment of Soybean Lodging Using UAV Imagery and Machine Learning
Source: MDPI journal article supplement (doi:10.3390/plants12162893), 2023-08-08
Supplement: s1 [file s1]

## Supplementary Files

**Table S1.** Confusion matrix and model performance metrics of four lodging classes of soybean using original dataset and four machine learning (XGBoost, RF, KNN, and ANN) classifiers.

| Classifier | Actual samples | NL  | ML | HL | SL | Precision | Recall | F1-score |
|------------|----------------|-----|----|----|----|-----------|--------|----------|
| XGBoost    | NL             | 201 | 1  | 0  | 0  | 0.80      | 1.00   | 0.89     |
|            | ML             | 35  | 1  | 0  | 0  | 0.25      | 0.03   | 0.05     |
|            | HL             | 10  | 2  | 0  | 0  | 0.00      | 0.00   | 0.00     |
|            | SL             | 4   | 0  | 0  | 0  | 0.00      | 0.00   | 0.00     |
| RF         | NL             | 200 | 2  | 0  | 0  | 0.80      | 0.99   | 0.88     |
|            | ML             | 35  | 1  | 0  | 0  | 0.25      | 0.03   | 0.05     |
|            | HL             | 11  | 1  | 0  | 0  | 0.00      | 0.00   | 0.00     |
|            | SL             | 4   | 0  | 0  | 0  | 0.00      | 0.00   | 0.00     |
| KNN        | NL             | 193 | 8  | 1  | 0  | 0.80      | 0.96   | 0.87     |
|            | ML             | 34  | 2  | 0  | 0  | 0.18      | 0.06   | 0.09     |
|            | HL             | 11  | 1  | 0  | 0  | 0.00      | 0.00   | 0.00     |
|            | SL             | 4   | 0  | 0  | 0  | 0.00      | 0.00   | 0.00     |
| ANN        | NL             | 186 | 4  | 3  | 0  | 0.75      | 0.96   | 0.84     |
|            | ML             | 35  | 0  | 0  | 0  | 0.00      | 0.00   | 0.00     |
|            | HL             | 21  | 1  | 0  | 0  | 0.00      | 0.00   | 0.00     |
|            | SL             | 4   | 0  | 0  | 0  | 0.00      | 0.00   | 0.00     |

**Table S2.** Confusion matrix and model performance metrics of four lodging classes of soybean using XGBoost classifier and SMOTE-Tomek Links, Borderline-SMOTE, SMOTE-NC, and ADASYN.

| Pre-processed Dataset | Actual samples | NL  | ML  | HL  | SL  | Precision | Recall | F1-score |
|-----------------------|----------------|-----|-----|-----|-----|-----------|--------|----------|
| SMOTE-Tomek Link      | NL             | 123 | 30  | 20  | 14  | 0.77      | 0.66   | 0.71     |
|                       | ML             | 21  | 166 | 10  | 4   | 0.82      | 0.83   | 0.82     |
|                       | HL             | 13  | 5   | 181 | 1   | 0.85      | 0.91   | 0.88     |
|                       | SL             | 2   | 1   | 1   | 171 | 0.90      | 0.98   | 0.94     |
| Borderline-SMOTE      | NL             | 135 | 20  | 15  | 6   | 0.77      | 0.77   | 0.77     |
|                       | ML             | 29  | 183 | 3   | 2   | 0.88      | 0.84   | 0.86     |
|                       | HL             | 8   | 4   | 179 | 0   | 0.91      | 0.94   | 0.92     |
|                       | SL             | 3   | 2   | 0   | 183 | 0.96      | 0.97   | 0.97     |
| SMOTE-NC              | NL             | 135 | 27  | 12  | 1   | 0.82      | 0.77   | 0.80     |

|        |    |     |     |     |     |      |      |      |
|--------|----|-----|-----|-----|-----|------|------|------|
|        | ML | 22  | 184 | 4   | 1   | 0.86 | 0.87 | 0.86 |
|        | HL | 7   | 4   | 179 | 0   | 0.92 | 0.94 | 0.93 |
|        | SL | 0   | 0   | 0   | 196 | 0.99 | 1.00 | 0.99 |
| ADASYN | NL | 122 | 30  | 23  | 6   | 0.80 | 0.67 | 0.73 |
|        | ML | 20  | 160 | 11  | 4   | 0.80 | 0.82 | 0.81 |
|        | HL | 11  | 9   | 179 | 1   | 0.84 | 0.90 | 0.86 |
|        | SL | 0   | 0   | 1   | 179 | 0.95 | 0.99 | 0.97 |

**Table S3.** Confusion matrix and model performance metrics of four lodging classes of soybean using RF classifier and SMOTE-Tomek Links, Borderline-SMOTE, SMOTE-NC, and ADASYN.

| Pre-processed Dataset | Actual samples | NL  | ML  | HL  | SL  | Precision | Recall | F1-score |
|-----------------------|----------------|-----|-----|-----|-----|-----------|--------|----------|
| SMOTE-Tomek Link      | NL             | 121 | 34  | 19  | 13  | 0.81      | 0.65   | 0.72     |
|                       | ML             | 16  | 174 | 6   | 5   | 0.82      | 0.87   | 0.84     |
|                       | HL             | 9   | 4   | 184 | 3   | 0.87      | 0.92   | 0.90     |
|                       | SL             | 4   | 0   | 2   | 169 | 0.89      | 0.97   | 0.93     |
| Borderline-SMOTE      | NL             | 134 | 22  | 16  | 4   | 0.78      | 0.76   | 0.77     |
|                       | ML             | 25  | 187 | 5   | 0   | 0.88      | 0.86   | 0.87     |
|                       | HL             | 10  | 4   | 177 | 0   | 0.89      | 0.93   | 0.91     |
|                       | SL             | 3   | 0   | 0   | 185 | 0.98      | 0.98   | 0.98     |
| SMOTE-NC              | NL             | 125 | 26  | 18  | 6   | 0.80      | 0.71   | 0.76     |
|                       | ML             | 22  | 179 | 7   | 3   | 0.85      | 0.85   | 0.85     |
|                       | HL             | 7   | 6   | 172 | 5   | 0.87      | 0.91   | 0.89     |
|                       | SL             | 2   | 0   | 1   | 193 | 0.93      | 0.98   | 0.96     |
| ADASYN                | NL             | 118 | 34  | 22  | 7   | 0.80      | 0.65   | 0.72     |
|                       | ML             | 19  | 161 | 12  | 3   | 0.79      | 0.83   | 0.80     |
|                       | HL             | 9   | 9   | 181 | 1   | 0.84      | 0.91   | 0.87     |
|                       | SL             | 2   | 1   | 0   | 195 | 0.95      | 0.98   | 0.97     |

**Table S4.** Confusion matrix and model performance metrics of four lodging classes of soybean using KNN classifier and SMOTE-Tomek Links, Borderline-SMOTE, SMOTE-NC, and ADASYN.

| Pre-processed Dataset | Actual samples | NL | ML | HL | SL | Precision | Recall | F1-score |
|-----------------------|----------------|----|----|----|----|-----------|--------|----------|
|-----------------------|----------------|----|----|----|----|-----------|--------|----------|

|                  |    |    |     |     |     |      |      |      |
|------------------|----|----|-----|-----|-----|------|------|------|
| SMOTE-Tomek Link | NL | 64 | 60  | 36  | 27  | 0.89 | 0.34 | 0.49 |
|                  | ML | 6  | 173 | 15  | 7   | 0.72 | 0.86 | 0.78 |
|                  | HL | 1  | 7   | 189 | 3   | 0.78 | 0.94 | 0.86 |
|                  | SL | 1  | 1   | 2   | 171 | 0.82 | 0.98 | 0.89 |
| Borderline-SMOTE | NL | 91 | 48  | 28  | 9   | 0.79 | 0.52 | 0.63 |
|                  | ML | 18 | 191 | 5   | 3   | 0.77 | 0.88 | 0.82 |
|                  | HL | 5  | 9   | 177 | 0   | 0.84 | 0.93 | 0.88 |
|                  | SL | 1  | 1   | 1   | 185 | 0.94 | 0.98 | 0.96 |
| SMOTE-NC         | NL | 84 | 55  | 24  | 12  | 0.74 | 0.48 | 0.58 |
|                  | ML | 18 | 172 | 17  | 4   | 0.72 | 0.82 | 0.76 |
|                  | HL | 10 | 12  | 164 | 4   | 0.77 | 0.86 | 0.81 |
|                  | SL | 2  | 1   | 9   | 184 | 0.90 | 0.94 | 0.92 |
| ADASYN           | NL | 61 | 51  | 49  | 20  | 0.80 | 0.34 | 0.47 |
|                  | ML | 9  | 170 | 15  | 1   | 0.72 | 0.87 | 0.79 |
|                  | HL | 6  | 12  | 181 | 1   | 0.73 | 0.91 | 0.81 |
|                  | SL | 0  | 2   | 2   | 194 | 0.90 | 0.98 | 0.98 |

**Table S5.** Confusion matrix and model performance metrics of four lodging classes of soybean using ANN classifier and SMOTE-Tomek Links, Borderline-SMOTE, SMOTE-NC, and ADASYN.

| Pre-processed Dataset | Actual samples | NL  | ML  | HL  | SL  | Precision | Recall | F1-score |
|-----------------------|----------------|-----|-----|-----|-----|-----------|--------|----------|
| SMOTE-Tomek Link      | NL             | 105 | 58  | 24  | 5   | 0.55      | 0.87   | 0.67     |
|                       | ML             | 14  | 162 | 8   | 4   | 0.86      | 0.72   | 0.78     |
|                       | HL             | 2   | 6   | 193 | 1   | 0.95      | 0.86   | 0.90     |
|                       | SL             | 0   | 0   | 0   | 181 | 1.00      | 0.95   | 0.97     |
| Borderline-SMOTE      | NL             | 133 | 56  | 21  | 0   | 0.63      | 0.90   | 0.74     |
|                       | ML             | 7   | 171 | 2   | 0   | 0.95      | 0.74   | 0.83     |
|                       | HL             | 6   | 3   | 191 | 0   | 0.95      | 0.89   | 0.92     |
|                       | SL             | 1   | 1   | 0   | 180 | 0.98      | 1.00   | 0.99     |
| SMOTE-NC              | NL             | 166 | 27  | 15  | 2   | 0.79      | 0.82   | 0.81     |
|                       | ML             | 21  | 149 | 10  | 0   | 0.83      | 0.81   | 0.82     |
|                       | HL             | 14  | 8   | 177 | 1   | 0.88      | 0.87   | 0.88     |
|                       | SL             | 0   | 0   | 0   | 182 | 1.00      | 0.98   | 0.99     |

|        |    |    |     |     |     |      |      |      |
|--------|----|----|-----|-----|-----|------|------|------|
| ADASYN | NL | 94 | 59  | 40  | 5   | 0.48 | 0.85 | 0.61 |
|        | ML | 12 | 166 | 9   | 1   | 0.88 | 0.72 | 0.79 |
|        | HL | 4  | 4   | 184 | 5   | 0.93 | 0.78 | 0.85 |
|        | SL | 0  | 0   | 0   | 191 | 1.00 | 0.94 | 0.97 |

**Table S6: Description of the hyperparameters used for the analysis using XGBoost Classifier.**

| Hyper-parameters | Description                                                                                                                                                                                  |
|------------------|----------------------------------------------------------------------------------------------------------------------------------------------------------------------------------------------|
| n_estimators     | The number of boosting rounds or decision tree to be built.                                                                                                                                  |
| max_depth        | The maximum depth of each decision tree.                                                                                                                                                     |
| learning_rate    | The step size shrinkage used in updating weights during each boosting round. A lower learning rate can help prevent overfitting but may require a higher number of boosting rounds.          |
| gamma            | The minimum loss reduction required to split a node. A higher value can lead to fewer and more conservative splits, while a lower value can lead to more splits and potentially overfitting. |
| subsample        | The fraction of observations to be randomly sampled for each tree. A lower value can lead to a more conservative model, while a higher value can lead to overfitting.                        |
| colsample_bytree | The fraction of columns to be randomly sampled for each tree. A lower value can lead to a more conservative model, while a higher value can lead to overfitting.                             |
| min_child_weight | The minimum sum of instance weight needed in a child. A higher value can lead to a more conservative model, while a lower value can lead to overfitting.                                     |

**Table S7: XGBoost hyper-parameter best values using TPE method for the analysis of original dataset and treated dataset (SMOTE-Tomek Links, SMOTE-ENN, Borderline-SMOTE, SMOTE-NC and ADASYN) for balancing.**

| Hyper-parameter | Search Space | Best Values      |                                     |                              |                                     |                             |                           |
|-----------------|--------------|------------------|-------------------------------------|------------------------------|-------------------------------------|-----------------------------|---------------------------|
|                 |              | Original dataset | Dataset Treated by SMOTE-Tomek Link | Dataset Treated by SMOTE-ENN | Dataset Treated by Borderline-SMOTE | Dataset Treated by SMOTE-NC | Dataset Treated by ADASYN |
| n_estimators    | 100, 1000    | 348              | 593                                 | 337                          | 664                                 | 944                         | 652                       |
| max_depth       | 3, 10        | 6                | 8                                   | 10                           | 10                                  | 8                           | 9                         |
| learning_rate   | 0.01, 1      | 0.01             | 0.08                                | 0.08                         | 0.03                                | 0.06                        | 0.09                      |
| gamma           | 0, 1         | 0.56             | 0.20                                | 0.03                         | 0.003                               | 0.19                        | 0.13                      |
| subsample       | 0.5, 1       | 0.99             | 0.62                                | 0.8                          | 0.80                                | 0.8                         | 0.71                      |

|                  |        |      |      |      |      |     |      |
|------------------|--------|------|------|------|------|-----|------|
| colsample_bytree | 0.5, 1 | 0.79 | 0.90 | 0.98 | 0.83 | 0.9 | 0.76 |
| min_child_weight | 1, 5   | 2    | 1    | 2    | 2    | 1   | 1    |

**Table S8: Description of the hyperparameters used for the analysis using RF Classifier.**

| Hyper-parameters  | Description                                                                                                                                                           |
|-------------------|-----------------------------------------------------------------------------------------------------------------------------------------------------------------------|
| n_estimators      | Determines the number of decision trees to be built in the random forest.                                                                                             |
| max_features      | Identifies the maximum number of features needed when splitting a node in each decision tree. It controls the randomness in feature selection.                        |
| min_samples_split | This hyperparameter determines the minimum number of samples needed to split an internal node in a decision tree.                                                     |
| min_samples_leaf  | Identifies the minimum number of samples required to be at a leaf node in a decision tree.                                                                            |
| Max_depth         | Identifies the number of maximum depths of a decision tree which mainly limits the number of levels in the tree, prevents overcomplexity, and reduce the overfitting. |
| bootstrap         | Determines the bootstrap samples were used or not to build each decision tree in the random forest.                                                                   |

**Table S9: RF hyper-parameter best values using grid search method for the analysis of original dataset and treated dataset (SMOTE-Tomek Links, SMOTE-ENN, Borderline-SMOTE, SMOTE-NC and ADASYN) for balancing.**

| Hyper-parameter   | Search Space | Best Values      |                                     |                              |                                     |                             |                           |
|-------------------|--------------|------------------|-------------------------------------|------------------------------|-------------------------------------|-----------------------------|---------------------------|
|                   |              | Original dataset | Dataset Treated by SMOTE-Tomek Link | Dataset Treated by SMOTE-ENN | Dataset Treated by Borderline-SMOTE | Dataset Treated by SMOTE-NC | Dataset Treated by ADASYN |
| n_estimators      | 50, 100, 200 | 50               | 50                                  | 100                          | 100                                 | 100                         | 50                        |
| max_features      | sqrt, log2   | sqrt             | sqrt                                | sqrt                         | sqrt                                | sqrt                        | sqrt                      |
| min_samples_split | 1, 2, 4      | 1                | 2                                   | 1                            | 1                                   | 1                           | 1                         |
| min_samples_leaf  | 1, 10        | 5                | 5                                   | 5                            | 10                                  | 5                           | 5                         |
| Max_depth         | 1, 10, 50    | 10               | 10                                  | 10                           | 10                                  | 10                          | 10                        |
| bootstrap         | True, False  | True             | True                                | True                         | True                                | True                        | True                      |

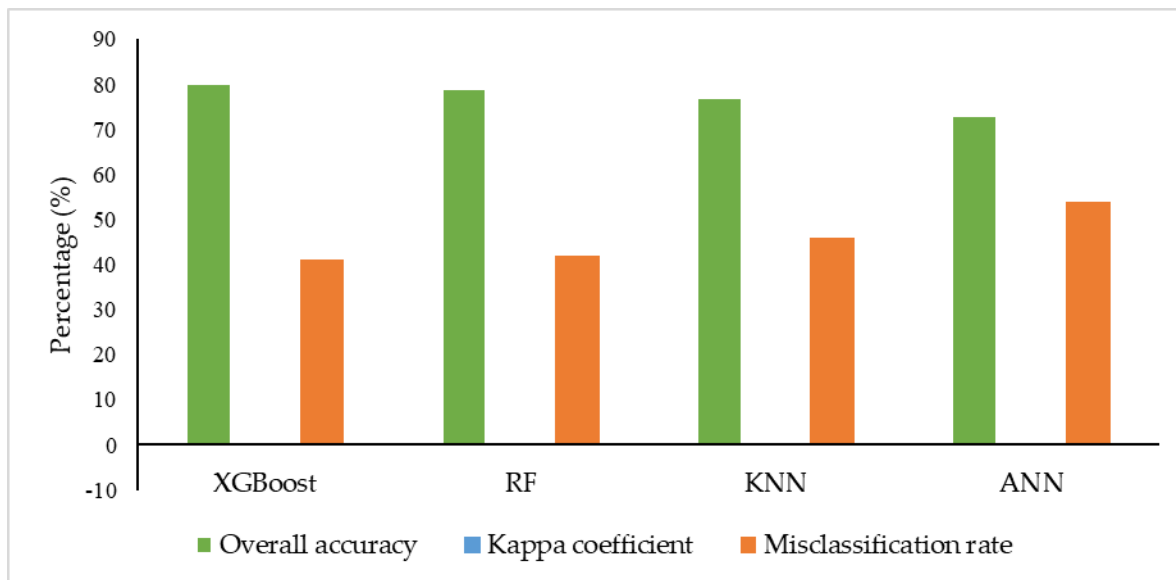

**Figure S1.** Overall accuracy, kappa coefficient and misclassification rate achieved using four original imbalanced dataset and four machine learning classifiers.

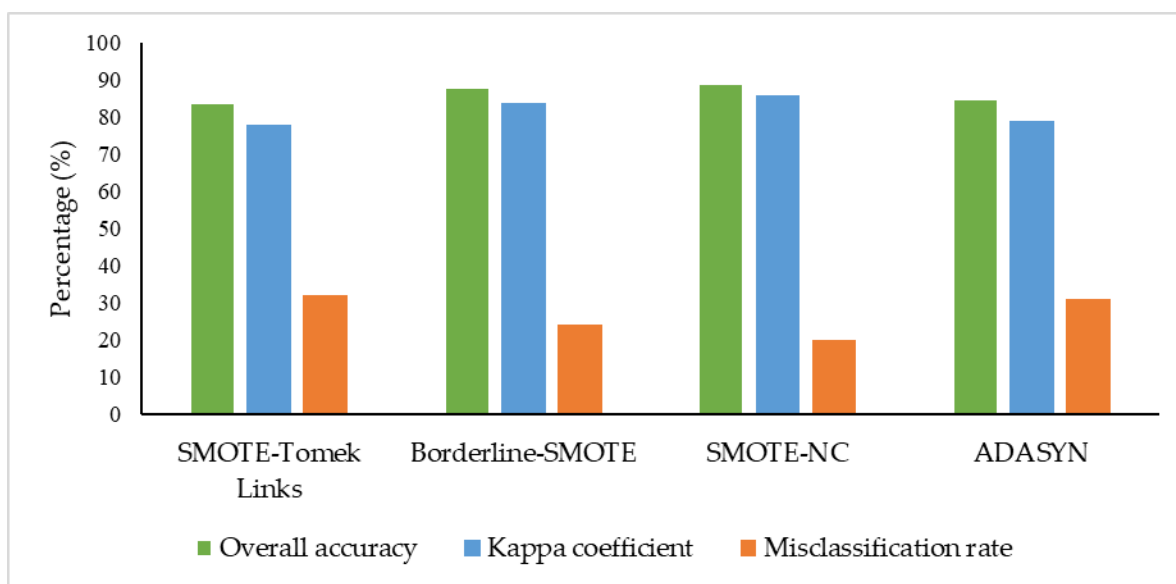

**Figure S2.** Overall accuracy, kappa coefficient and misclassification rate achieved using four (SMOTE-Tomek Links, Borderline-SMOTE, SMOTE-NC, and ADASYN) balanced dataset and XGBoost classifier.

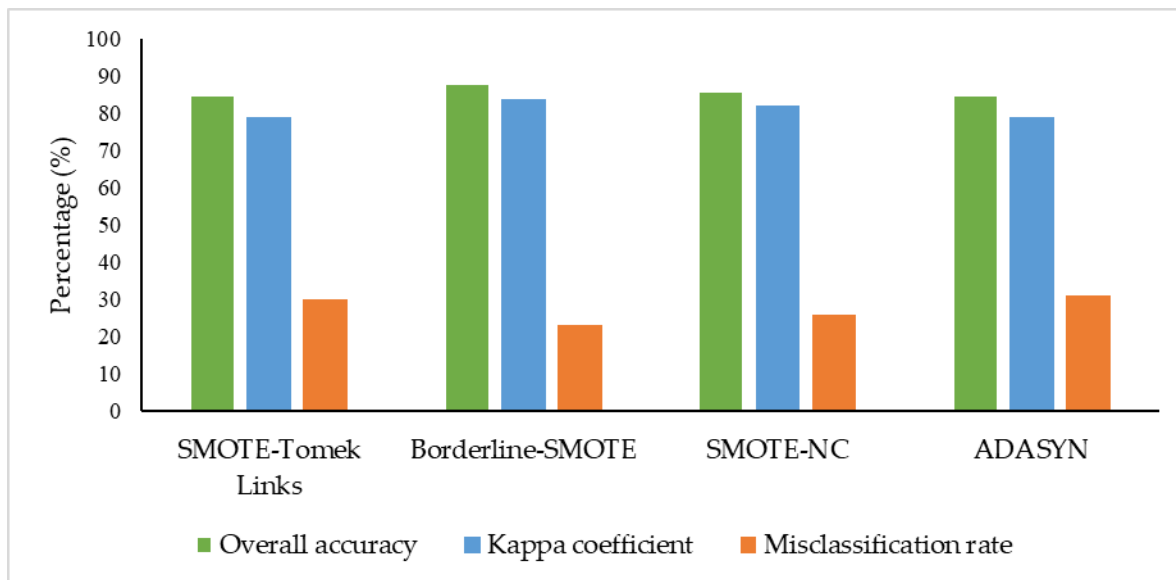

**Figure S3.** Overall accuracy, kappa coefficient and misclassification rate achieved using four (SMOTE-Tomek Links, Borderline-SMOTE, SMOTE-NC, and ADASYN) balanced dataset and RF classifier.

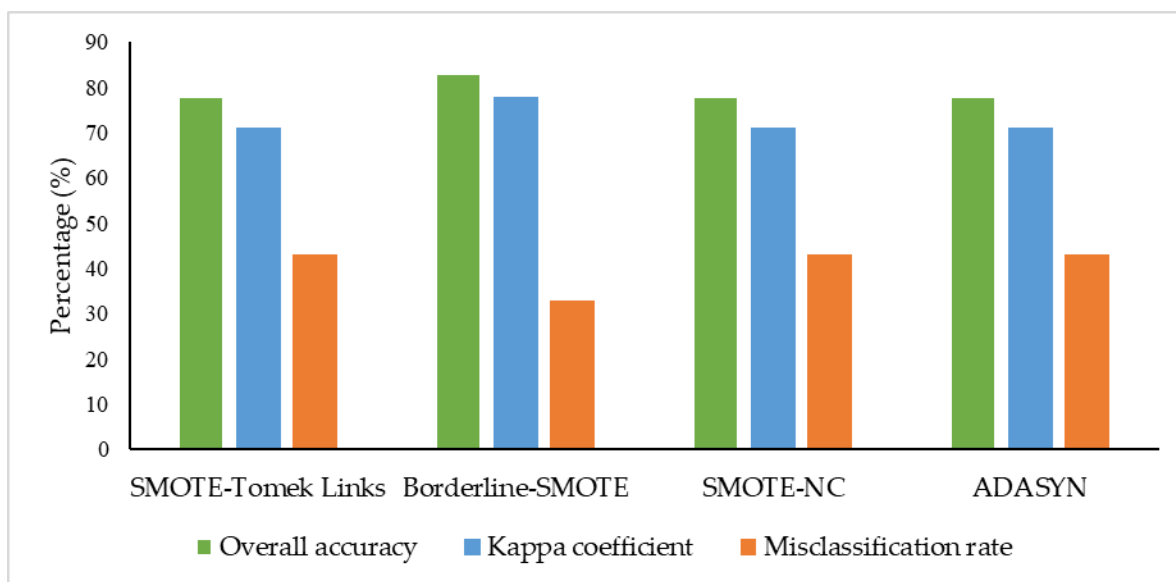

**Figure S4.** Overall accuracy, kappa coefficient and misclassification rate achieved using four (SMOTE-Tomek Links, Borderline-SMOTE, SMOTE-NC, and ADASYN) balanced dataset and KNN classifier.

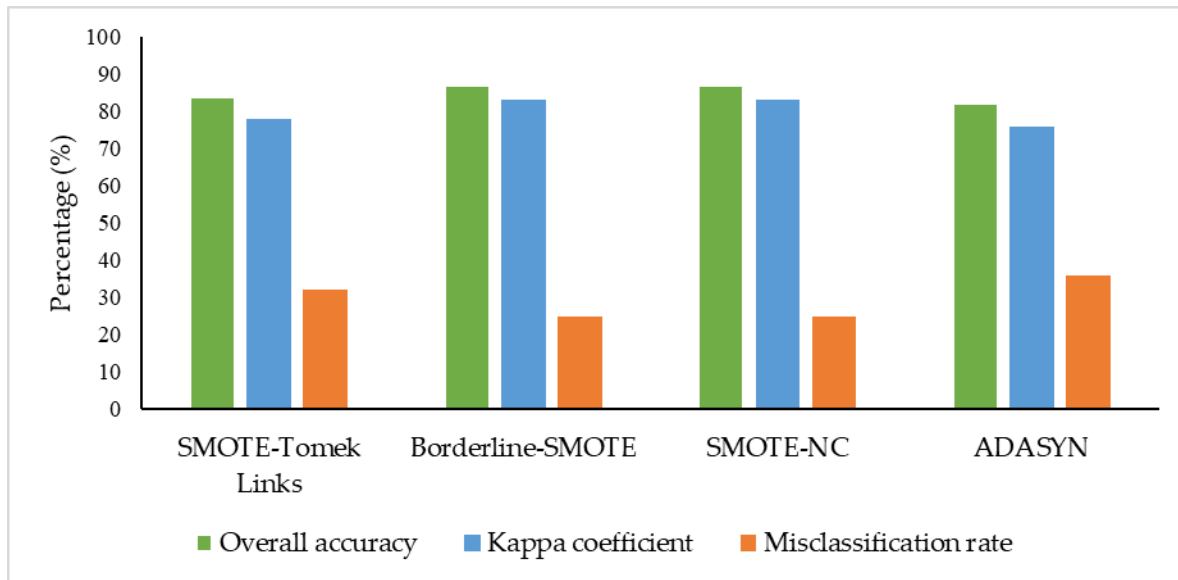

**Figure S5.** Overall accuracy, kappa coefficient and misclassification rate achieved using four (SMOTE-Tomek Links, Borderline-SMOTE, SMOTE-NC, and ADASYN) balanced dataset and ANN classifier.



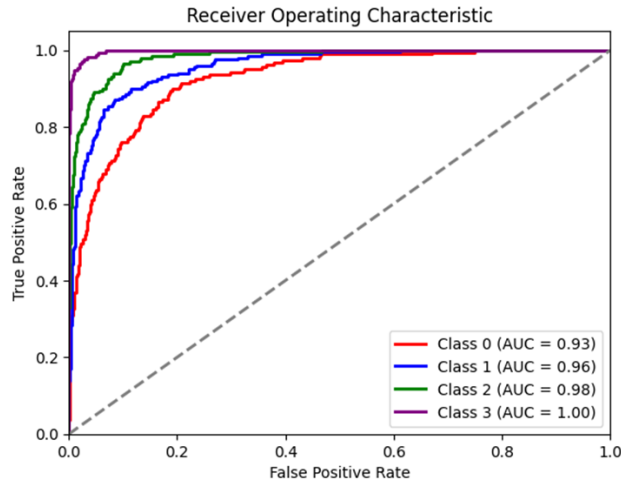

(a) SMOTE-Tomek Links

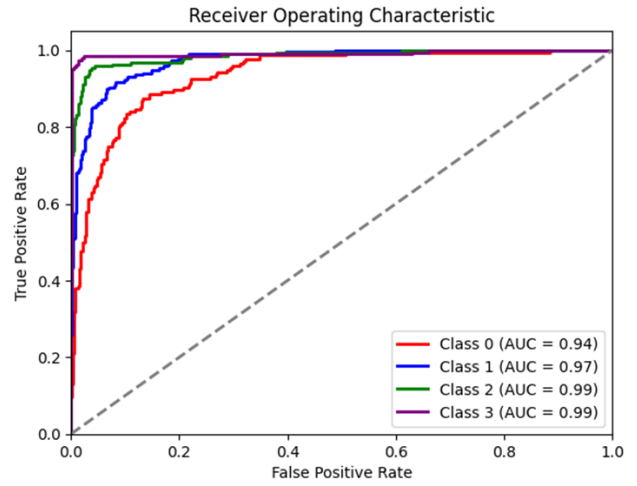

(b) Borderline-SMOTE

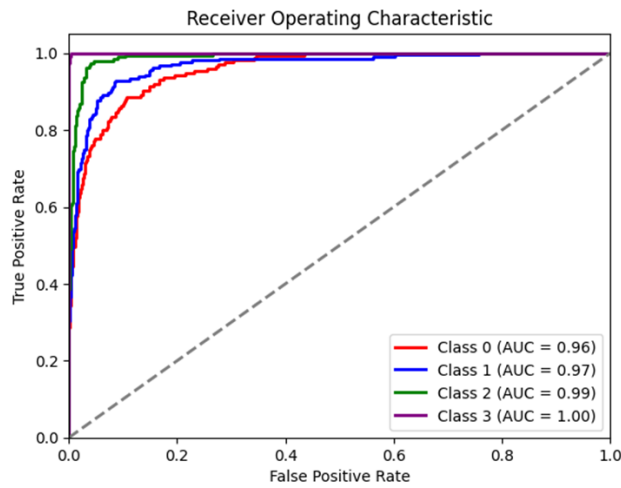

(c) SMOTE-NC

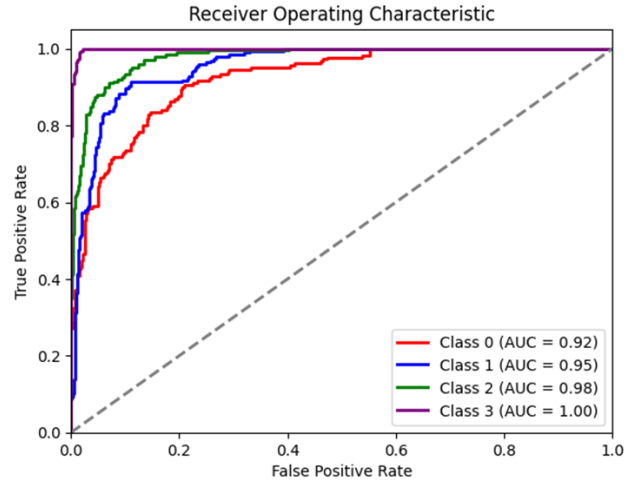

(d) ADASYN

**Figure S6.** The ROC curve using four (SMOTE-Tomek Links, Borderline-SMOTE, SMOTE-NC, and ADASYN) balanced datasets and XGBoost classifier.

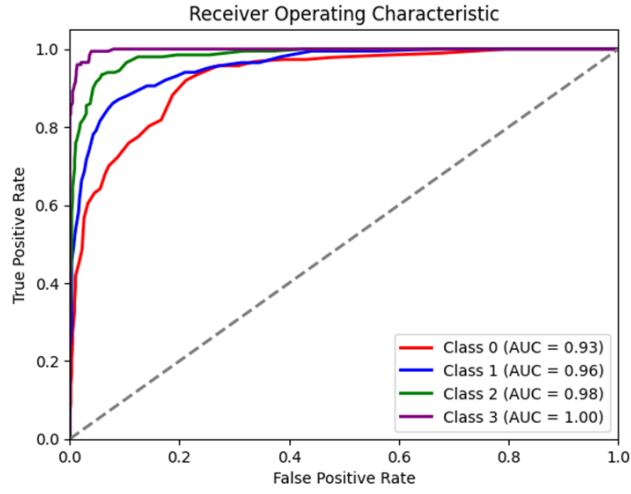

(a) SMOTE-Tomek Links

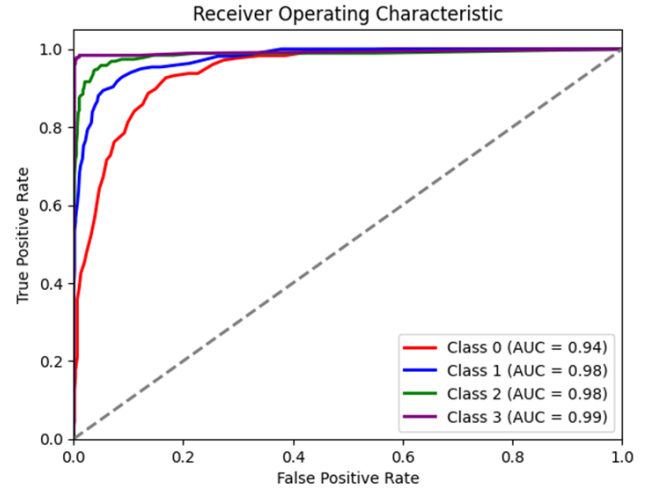

(b) Borderline-SMOTE

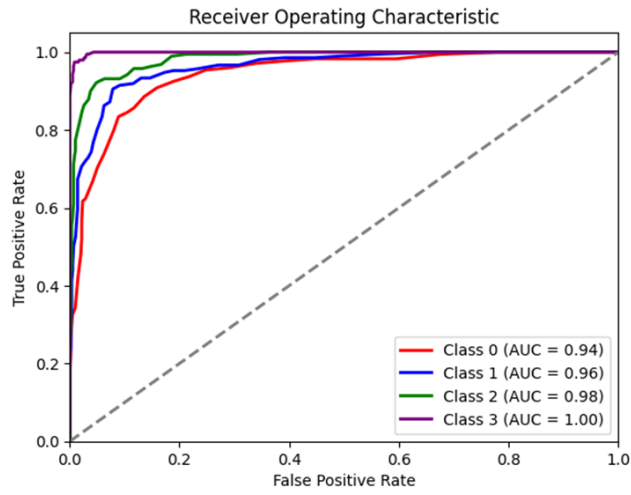

(c) SMOTE-NC

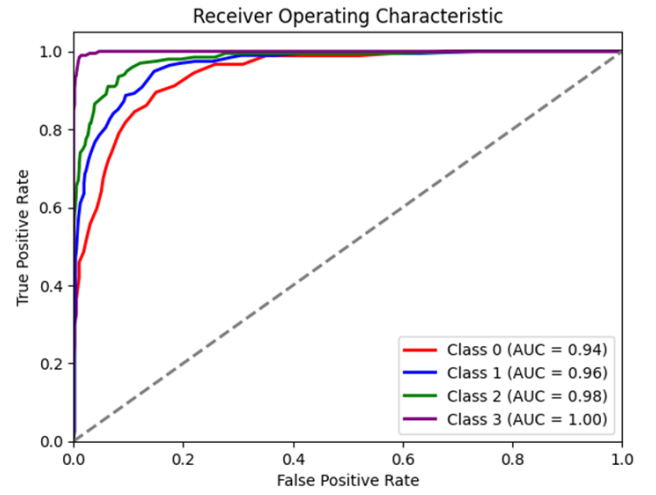

(d) ADASYN

**Figure S7.** The ROC curve using four (SMOTE-Tomek Links, Borderline-SMOTE, SMOTE-NC, and ADASYN) balanced datasets and RF classifier.

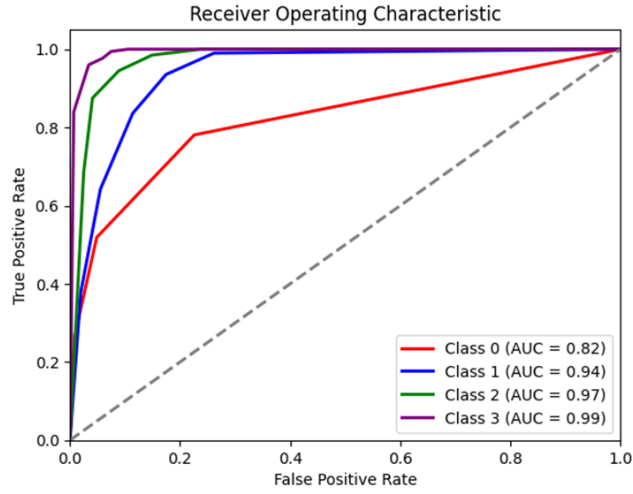

(a) SMOTE-Tomek Links

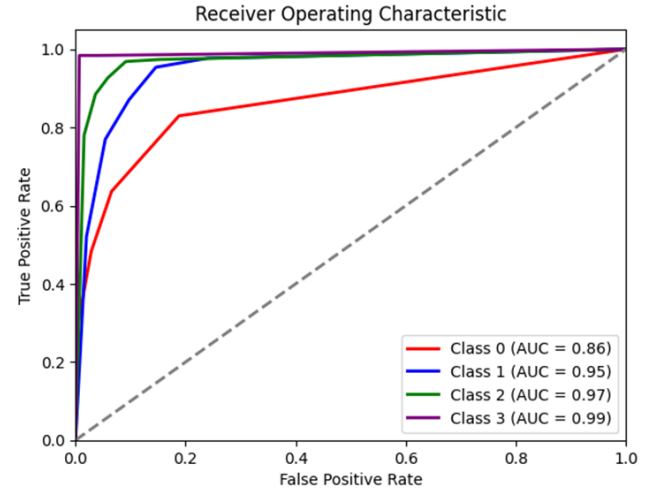

(b) Borderline-SMOTE

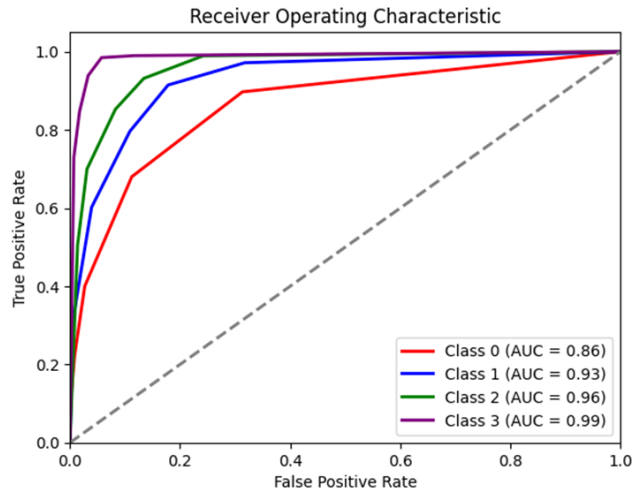

(c) SMOTE-NC

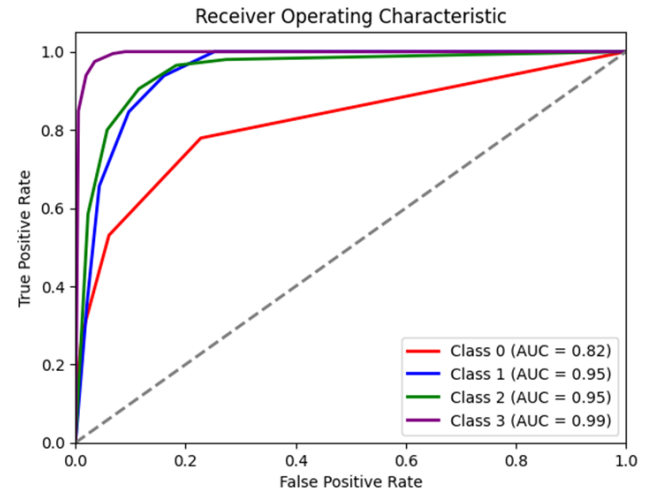

(d) ADASYN

**Figure S8.** The ROC curve using four (SMOTE-Tomek Links, Borderline-SMOTE, SMOTE-NC, and ADASYN) balanced datasets and KNN classifier.

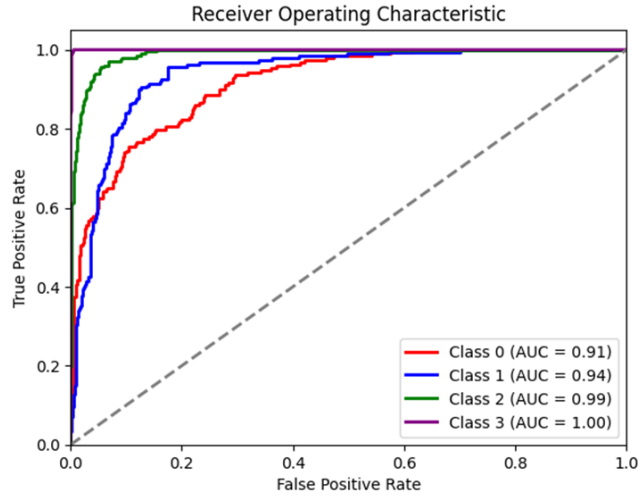

(a) SMOTE-TomekLinks

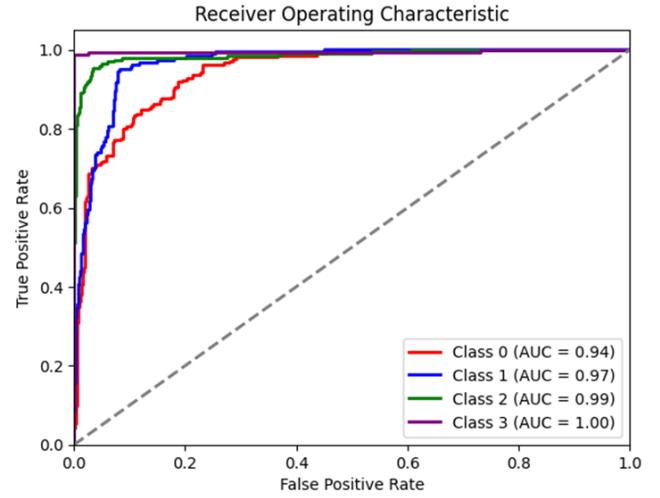

(b) Borderline-SMOTE

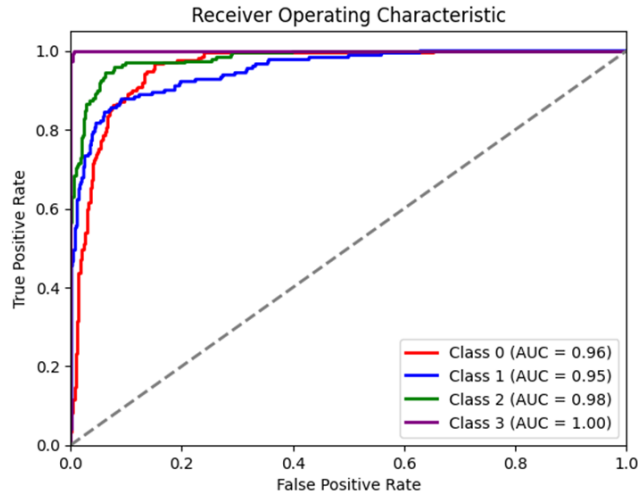

(c) SMOTE-NC

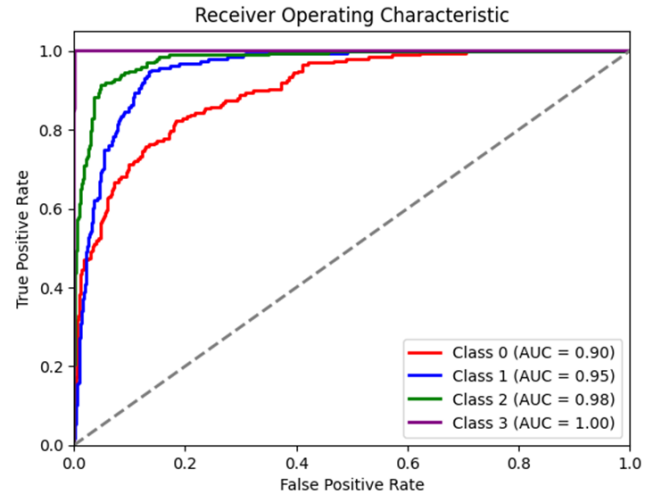

(d) ADASYN

**Figure S9.** The ROC curve using four (SMOTE-Tomek Links, Borderline-SMOTE, SMOTE-NC, and ADASYN) balanced datasets and ANN classifier.

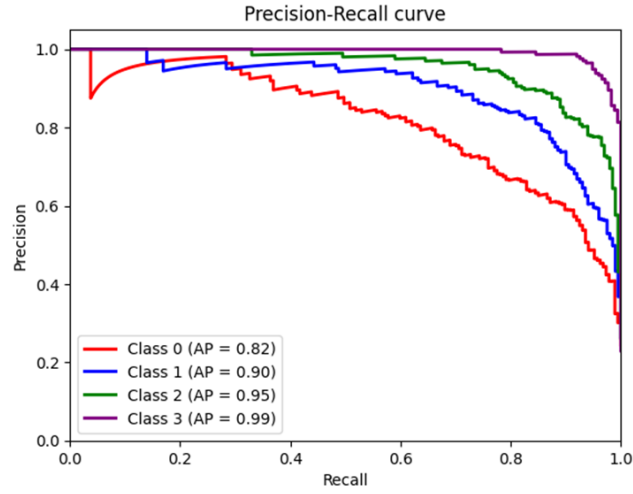

(a) SMOTE-Tomek Links

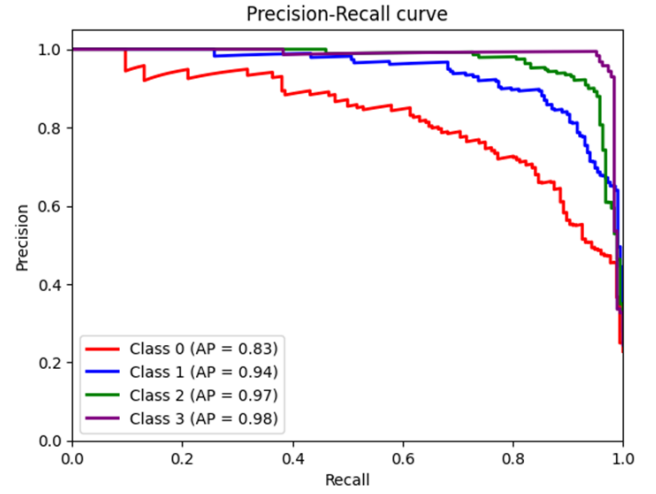

(b) Borderline-SMOTE

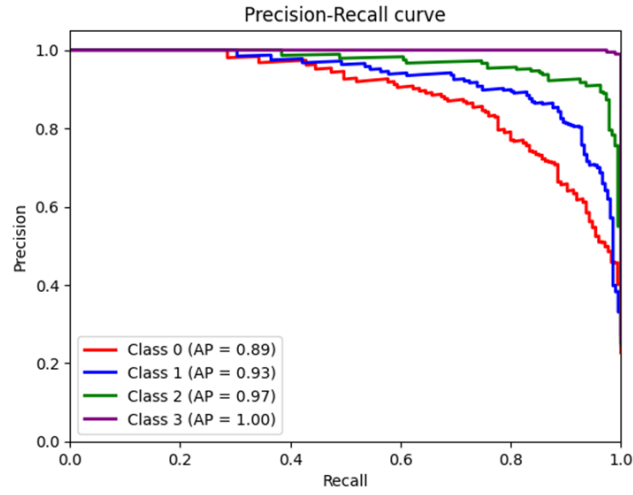

(c) SMOTE-NC

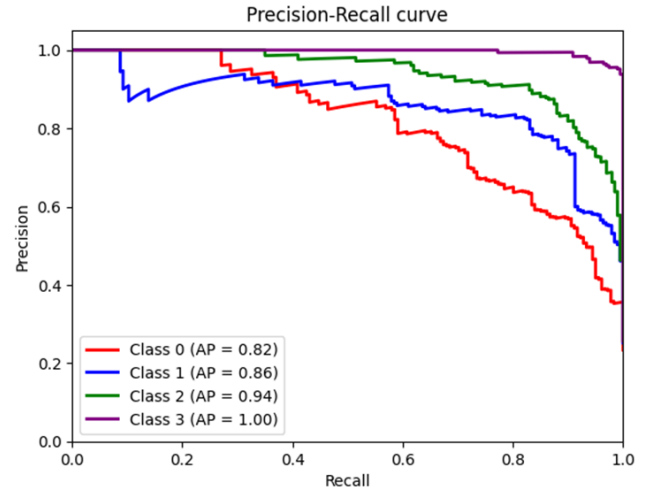

(d) ADASYN

**Figure S10.** The Precision-Recall curve using four (SMOTE-Tomek Links, Borderline-SMOTE, SMOTE-NC, and ADASYN) balanced datasets and XGBoost classifier.

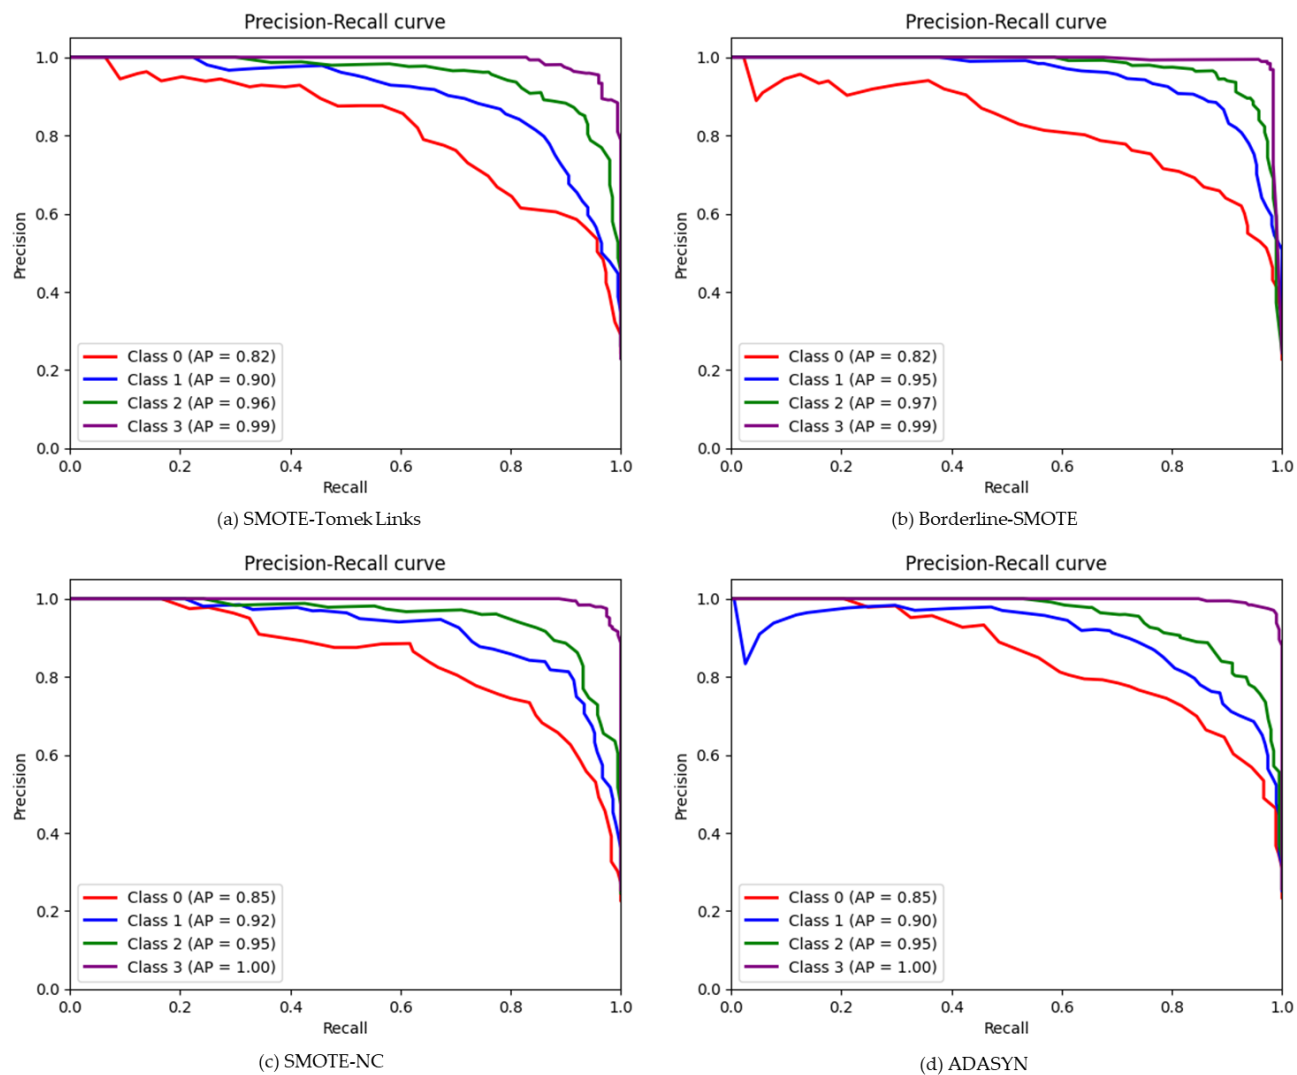

**Figure S11.** The Precision-Recall curve using four (SMOTE-Tomek Links, Borderline-SMOTE, SMOTE-NC, and ADASYN) balanced datasets and RF classifier.

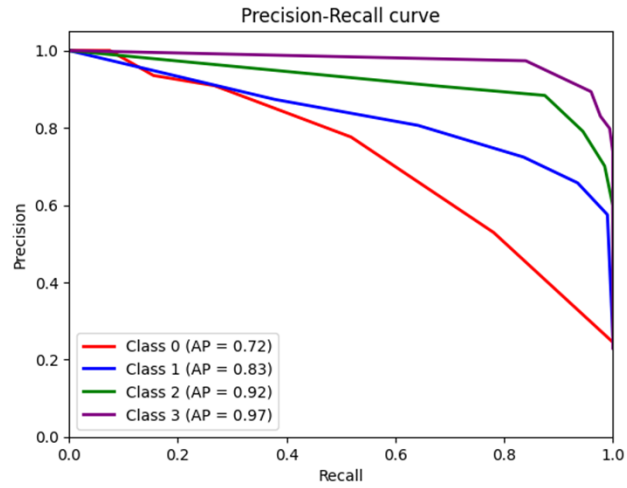

(a) SMOTE-Tomek Links

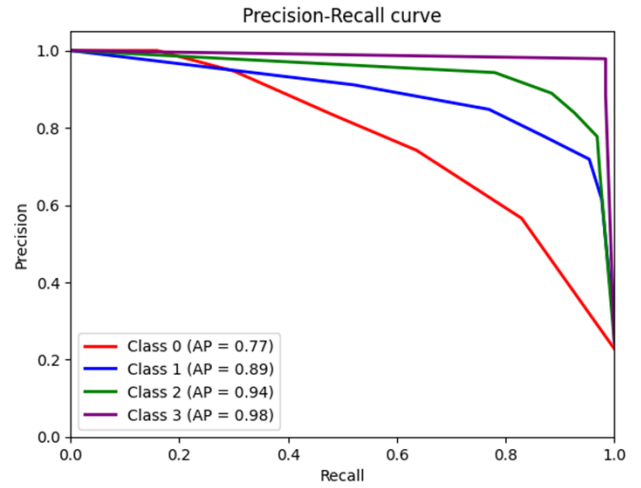

(b) Borderline-SMOTE

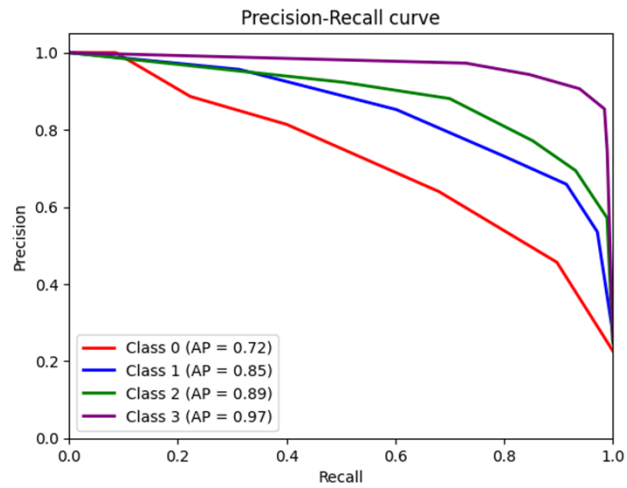

(c) SMOTE-NC

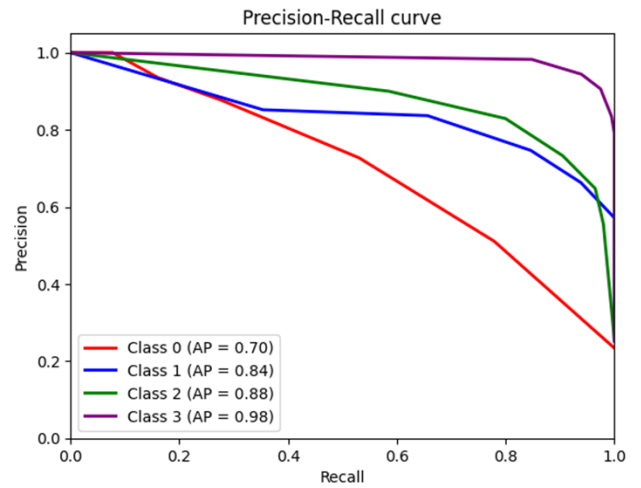

(d) ADASYN

**Figure S12.** The Precision-Recall curve using four (SMOTE-Tomek Links, Borderline-SMOTE, SMOTE-NC, and ADASYN) balanced datasets and KNN classifier.

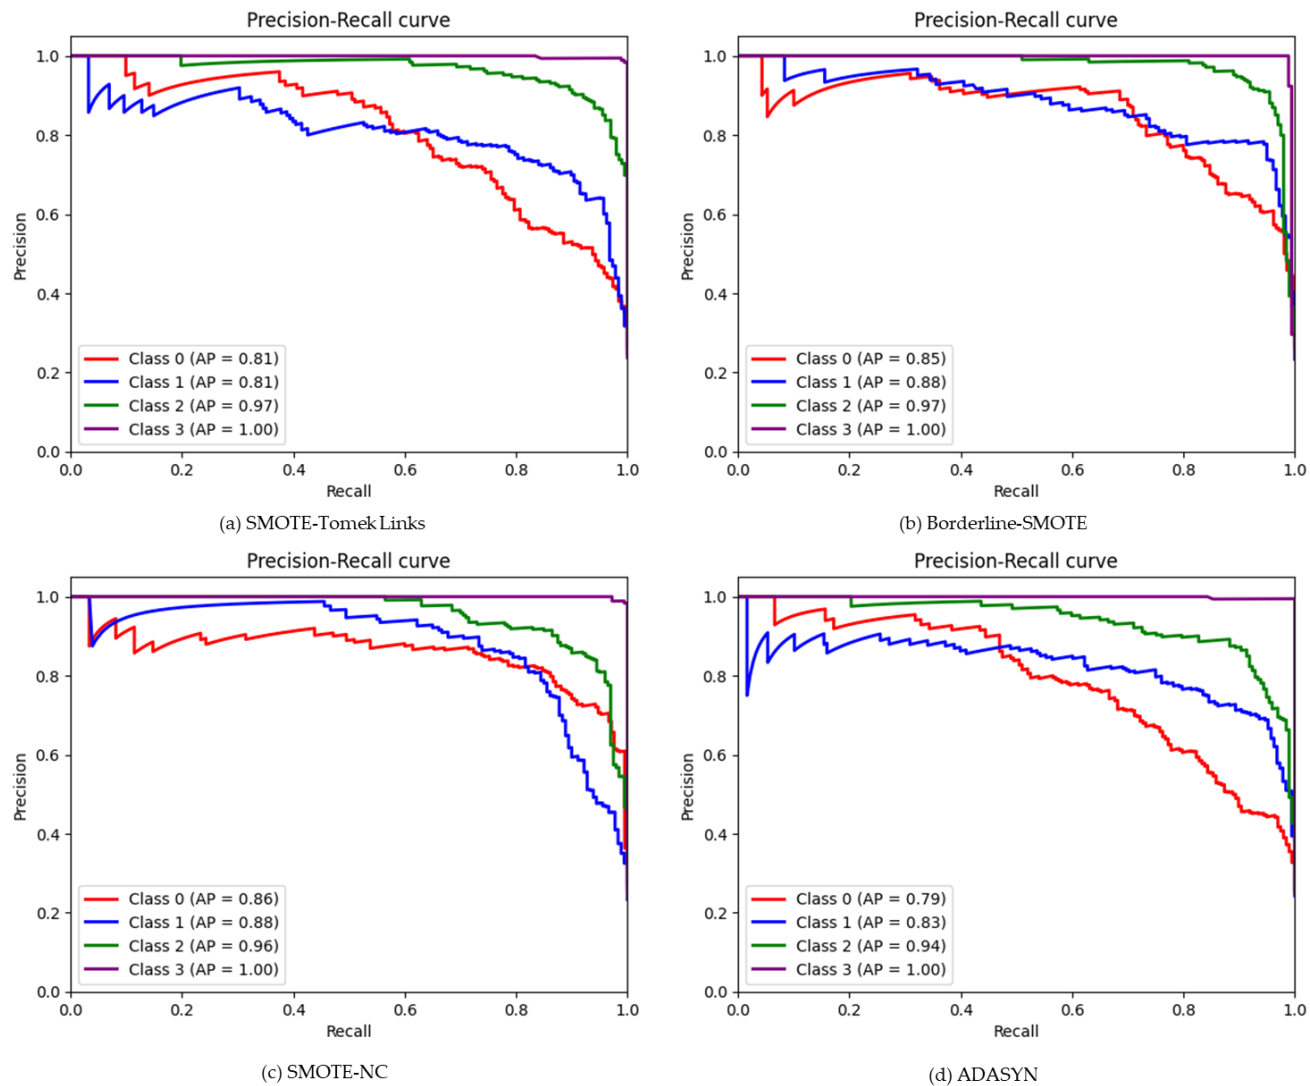

**Figure S13.** The Precision-Recall curve using four (SMOTE-Tomek Links, Borderline-SMOTE, SMOTE-NC, and ADASYN) balanced datasets and ANN classifier.
